# Supplementary material
Source: MDPI journal article supplement (https://www.mdpi.com/2073-4433/9/8/320)
Supplement: s1 [file s1]

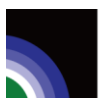

## Supporting Information

Table S1. Studies below room temperature for the reaction of OH radicals with hydrocarbons.

| Compounds          | Technique*                                                                  | Temperature Range (K) | Reference               |
|--------------------|-----------------------------------------------------------------------------|-----------------------|-------------------------|
| <i>n</i> -butane   | RR (relative to ethane, $k=1.49 \times 10^{-17} T^2 e^{-499/T}$ )           | 235–361               | DeMore and Bayes [1]    |
|                    | PLP-LIF                                                                     | 231–378               | Talukdar et al. [2]     |
| <i>n</i> -pentane  | RR (relative to <i>n</i> -butane, $k=1.81 \times 10^{-17} T^2 e^{114/T}$ )  | 233–364               | DeMore and Bayes [1]    |
|                    | RR (relative to 2-methylpropane, $k=1.17 \times 10^{-17} T^2 e^{213/T}$ )   | 243–325               | Harris and Kerr [3]     |
|                    | PLP-LIF                                                                     | 224–372               | Talukdar et al. [2]     |
| <i>n</i> -hexane   | RR/DF/MS                                                                    | 240–340               | Crawford et al. [4]     |
| <i>n</i> -heptane  | RR/DF/MS                                                                    | 240–340               | Crawford et al. [4]     |
|                    | RR (relative to several hydrocarbons)                                       | 241/406               | Wilson et al. [5]       |
| <i>n</i> -octane   | RR/DF/MS                                                                    | 240–340               | Li et al. [6]           |
| <i>n</i> -nonane   | RR/DF/MS                                                                    | 240–340               | Li et al. [6]           |
| cyclooctane        | HPFS                                                                        | 237–379               | Sprengnether et al. [7] |
|                    | RR/DF/MS                                                                    | 240–340               | Singh et al. [8]        |
| 2,2-dimethylbutane | RR (relative to <i>n</i> -pentane, $k=2.52 \times 10^{-17} T^2 e^{158/T}$ ) | 245–328               | Harris and Kerr [3]     |
| Benzene            | FPRF                                                                        | 250–298               | Tully et al. [9]        |
|                    | FPRF                                                                        | 239–352               | Witte et al. [10]       |
|                    | RR (relative to toluene, $k=0.79 \times 10^{-12} e^{614/T}$ )               | 274–363               | Semadeni et al. [11]    |
| Toluene            | FPRF                                                                        | 213–352               | Tully et al. [9]        |
| <i>o</i> -xylene   | RR/DF/MS                                                                    | 240–340               | Mehta et al. [12]       |
| <i>p</i> -xylene   | RR/DF/MS                                                                    | 240–340               | Mehta et al. [12]       |
|                    | FPRF                                                                        | 300–350               | Alarcón et al. [13]     |

\*RR: relative rate

PLP-LIF: pulsed laser photolysis–laser induced fluorescence

DF: discharge flow

MS: mass spectrometry

HPFS: high pressure flow system

FPRF: flash photolysis resonance fluorescence

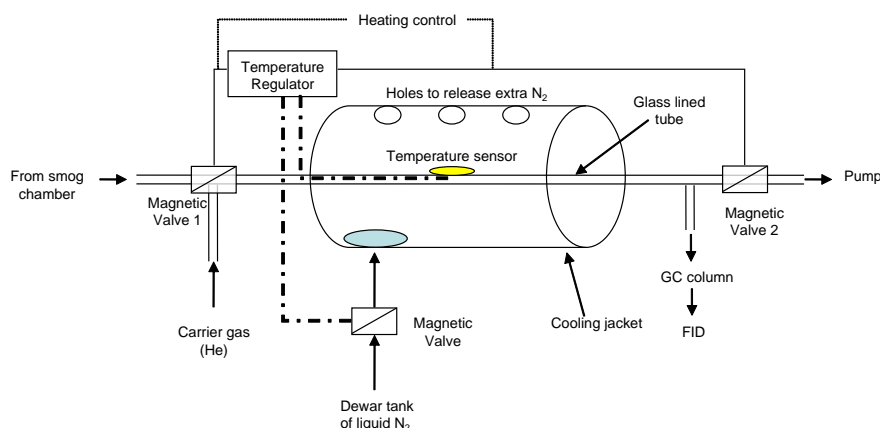

**Figure S1.** Schematic flowchart of the sample enrichment system connected with gas chromatographic analysis of the gas phase in the smog chamber.

### S1. Gas containers to introduce hydrocarbons into chamber

Two gas containers (1.3 L each) were used to introduce the hydrocarbons into the smog chamber. Gas container 1 was filled with the 13 compounds *n*-butane, *n*-pentane, *n*-hexane, *n*-heptane, *n*-octane, *n*-nonane, cyclooctane, 2,2-dimethylbutane, 2,2-dimethylpentane, 2,2-dimethylhexane, 2,2,4-trimethylpentane, benzene and *n*-perfluorohexane, and gas container 2 was filled with the other 5 hydrocarbons (2,2,3,3-tetramethylbutane and the aromatics toluene, ethylbenzene, *p*-xylene and *o*-xylene). The stock concentration of each of the hydrocarbons was around 1300 ppm in the gas container. By taking 50 ml gas samples from each container by a gas-tight syringe, and initial concentrations of about 20 ppb were obtained in the smog chamber.

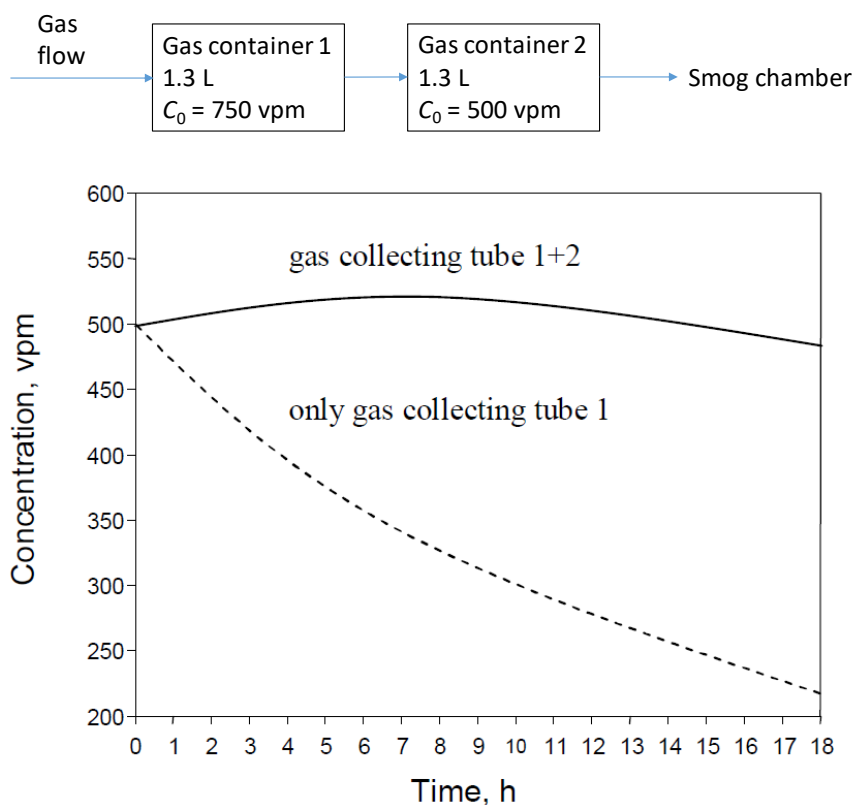

**Figure S2.** Dosage of methyl nitrite into the smog chamber, using a twin of gas containers. This method warrants a fairly constant production of OH [14].

### S2. Hydrocarbons used in the experiments

*n*-Butane (liquid gas bottle, AIR LIQUIDE Deutschland GmbH), *n*-pentane (Grüssing GmbH), *n*-hexane (Merck kGaA, UniSolv), *n*-heptane (Fluka AG, UV Spectroscopy grade), *n*-octane (Fluka AG), *n*-nonane (Riedel-de Haen AG), cyclooctane (Sigma-Aldrich), 2,2-dimethylbutane (Janssen Chimica), 2,2-dimethylpentane (Janssen Chimica), 2,2-dimethylhexane (Sigma-Aldrich), 2,2,4-trimethylpentane (Janssen Chimica), 2,2,3,3-tetramethylbutane (Sigma-Aldrich), benzene (Riedel-de Haen AG), toluene (Carl Roth GmbH&Co KG), ethylbenzene (Riedel-de Haen AG), *p*-xylene (Fluka AG), *o*-xylene (Fluka AG), *n*-perfluorohexane (Sigma-Aldrich)

### S3. Illustration of the Twin of Gas Containers to Inject Methyl Nitrite into Chamber

A twin of gas containers (1.3 L of each) were connected one by another and known volumes of methyl nitrite were injected into the gas containers by a syringe respectively. The gaseous methyl nitrite was slowly flushed by air into the chamber. With the aid of the twin of gas collecting tubes, an approximately constant concentration of OH was maintained during the experiment [1].

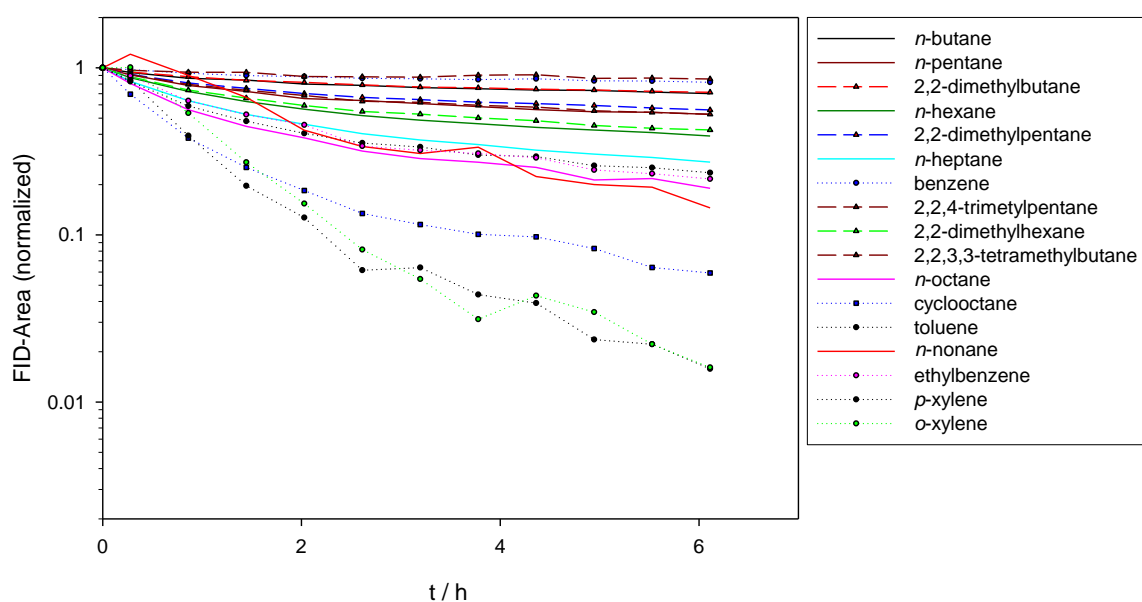

**Figure S3.** Decrease of the hydrocarbon concentrations (normalized by *n*-perfluorohexane) by the reaction with OH during a smog chamber run at 248 K.

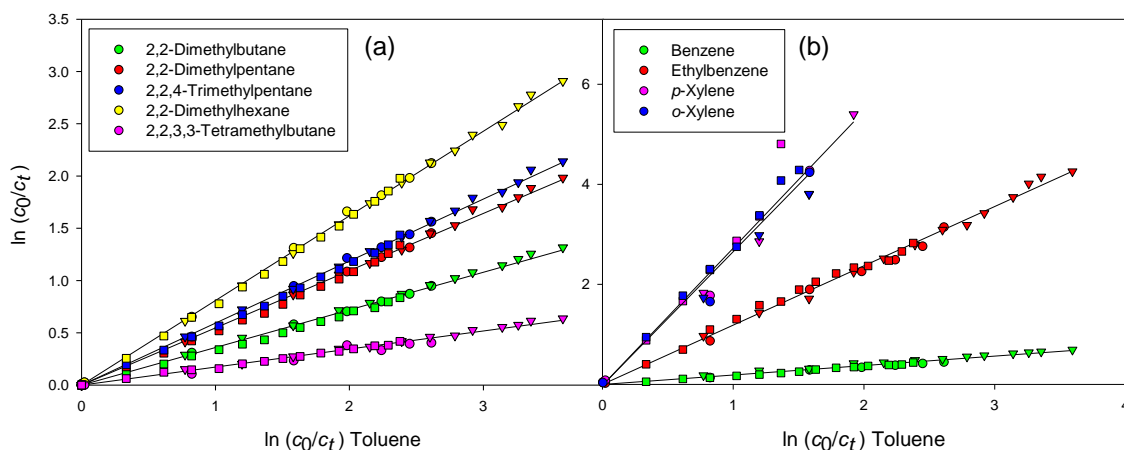

**Figure S4.** Plots of  $\ln(c_0/c_t)$  of hydrocarbons versus toluene (reference substance) from data points of three experimental runs at 288 K, respectively ( $\nabla$ ,  $\circ$  and  $\square$  distinguish data points from different experimental runs). (a) branched-chain alkanes; (b) aromatic hydrocarbons.

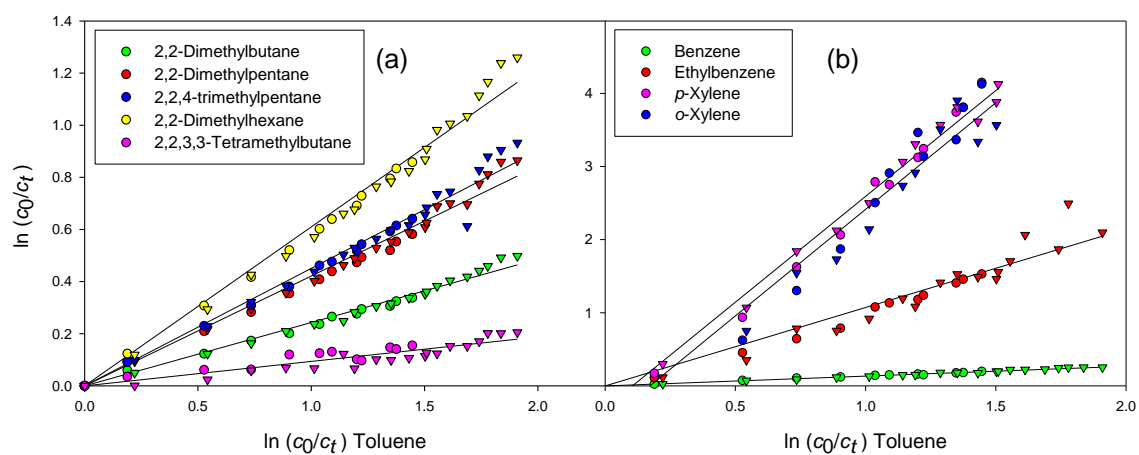

**Figure S5.** Plots of  $\ln(c_0/c_t)$  of hydrocarbons versus toluene (reference substance) from data points of two experimental runs at 248 K, respectively ( $\nabla$  and  $\circ$  distinguish data points from different experimental runs). (a) branched-chain alkanes; (b) aromatic hydrocarbons.

**Table S2.** Rate constants for the reaction of OH radicals with hydrocarbons at 248K.

| Compound                  | Rate constant, ( $k_{\text{OH}} \pm 2\sigma$ ) / $10^{-12} \text{ cm}^3 \text{ s}^{-1}$ |                                   |                 |
|---------------------------|-----------------------------------------------------------------------------------------|-----------------------------------|-----------------|
|                           | Toluene as Reference <sup>a</sup>                                                       | Pentane as Reference <sup>b</sup> | Average         |
| <i>n</i> -Butane          | $1.74 \pm 0.03$                                                                         | $1.59 \pm 0.02$                   | $1.66 \pm 0.04$ |
| <i>n</i> -Pentane         | $3.19 \pm 0.03$                                                                         | $2.93^{\text{b}}$                 | $3.06 \pm 0.03$ |
| <i>n</i> -Hexane          | $4.79 \pm 0.08$                                                                         | $4.56 \pm 0.09$                   | $4.68 \pm 0.12$ |
| <i>n</i> -Heptane         | $6.51 \pm 0.10$                                                                         | $6.32 \pm 0.14$                   | $6.42 \pm 0.17$ |
| <i>n</i> -Octane          | $8.16 \pm 0.16$                                                                         | $7.97 \pm 0.20$                   | $8.07 \pm 0.26$ |
| <i>n</i> -Nonane          | $8.83 \pm 0.64$                                                                         | $8.47 \pm 0.56$                   | $8.65 \pm 0.85$ |
| Cyclooctane               | $13.9 \pm 0.3$                                                                          | $12.8 \pm 0.3$                    | $13.3 \pm 0.4$  |
| 2,2-Dimethylbutane        | $1.72 \pm 0.03$                                                                         | $1.69 \pm 0.01$                   | $1.71 \pm 0.03$ |
| 2,2-Dimethylpentane       | $2.99 \pm 0.06$                                                                         | $2.96 \pm 0.02$                   | $2.97 \pm 0.06$ |
| 2,2-Dimethylhexane        | $4.32 \pm 0.09$                                                                         | $4.28 \pm 0.03$                   | $4.30 \pm 0.09$ |
| 2,2,4-Trimethylpentane    | $3.20 \pm 0.08$                                                                         | $3.19 \pm 0.03$                   | $3.20 \pm 0.09$ |
| 2,2,3,3-Tetramethylbutane | $0.66 \pm 0.04$                                                                         | $0.73 \pm 0.03$                   | $0.70 \pm 0.05$ |
| Benzene                   | $0.95 \pm 0.01$                                                                         | $0.90 \pm 0.01$                   | $0.92 \pm 0.01$ |
| Toluene                   | $7.09^{\text{a}}$                                                                       | $6.52 \pm 0.07$                   | $6.81 \pm 0.07$ |
| Ethylbenzene              | $7.60 \pm 0.35$                                                                         | $7.41 \pm 0.18$                   | $7.51 \pm 0.39$ |
| <i>p</i> -Xylene          | $18.7 \pm 0.6$                                                                          | $17.3 \pm 0.6$                    | $18.0 \pm 0.85$ |
| <i>o</i> -Xylene          | $17.6 \pm 1.1$                                                                          | $16.3 \pm 1.0$                    | $16.9 \pm 1.49$ |

<sup>a</sup> The Arrhenius expression leads to  $k$  (toluene) =  $7.09 \times 10^{-12} \text{ cm}^3 \text{ s}^{-1}$  at 248K [15]

<sup>b</sup> The Arrhenius expression leads to  $k$  (*n*-pentane) =  $2.93 \times 10^{-12} \text{ cm}^3 \text{ s}^{-1}$  at 248K [16]

Table S3 Arrhenius parameters A and B corresponding to the equation  $k_{\text{OH}} = A e^{(-B/T)}$ .

|                  | $\ln(A/\text{cm}^3 \text{ s}^{-1})$ | $B/\text{K}$   |
|------------------|-------------------------------------|----------------|
| <i>o</i> -Xylene | $-25.8 \pm 0.4$                     | $-203 \pm 126$ |
| <i>p</i> -Xylene | $-25.3 \pm 0.4$                     | $-62 \pm 116$  |
| Ethylbenzene     | $-25.7 \pm 0.5$                     | $-8 \pm 135$   |

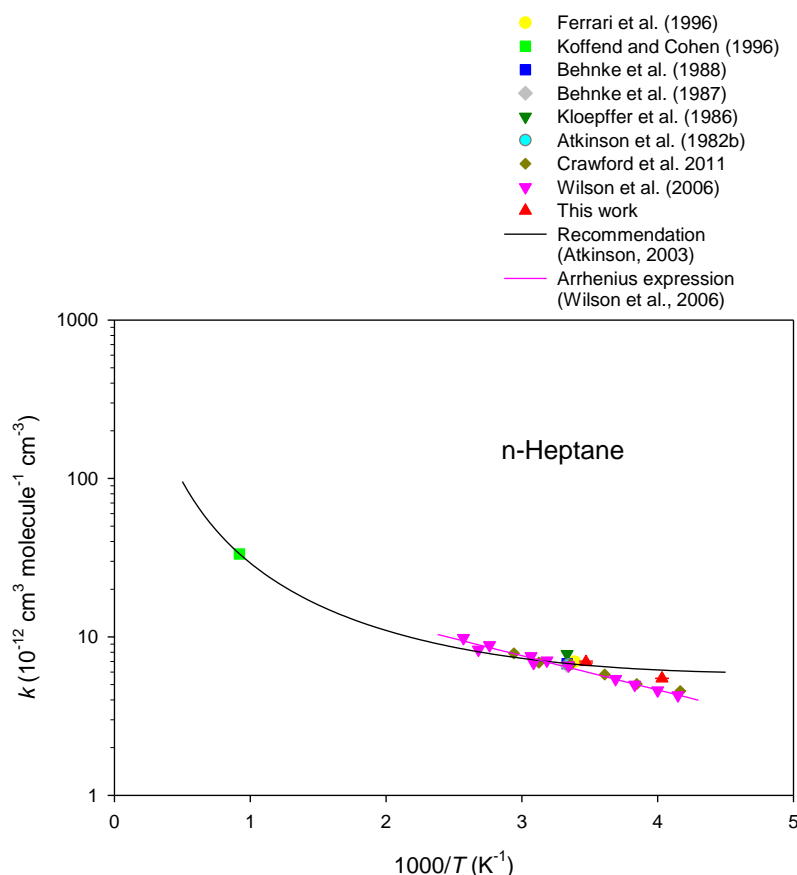

**Figure S6.** Arrhenius plots of the rate constant for the reaction of OH radicals with *n*-heptane.

For *n*-heptane, our data differs from both the measurements from Crawford et al. and Wilson et al. In order to explain the discrepancy, we recalculate the rate constant by using *n*-butane, *n*-pentane and *n*-hexane as reference compounds respectively. The calculated rate constant decrease with increasing CH<sub>2</sub> chains:  $7.00 \pm 0.19$ ,  $6.32 \pm 0.14$  and  $5.47 \pm 0.01$  (in unit  $\times 10^{-12} \text{ cm}^3 \text{ molecule}^{-1} \text{ s}^{-1}$ ) respectively. When using *n*-hexane alone as a reference compound, a lower reaction rate constant for *n*-heptane is obtained and it is very close to the data from Crawford et al. and Wilson et al. (figure S6). The understanding of temperature-dependence of *n*-pentane is more comprehensive, therefore, we choose *n*-pentane as our reference compound.

## References

1. DeMore, W.B.; Bayes, K.D. Rate constants for the reactions of hydroxyl radical with several alkanes, cycloalkanes, and dimethyl ether. *J. Phys. Chem. A* **1999**, *103*, 2649–2654.

2. Talukdar, R.K.; Mellouki, A.; Gierczak, T.; Barone, S.; Chiang S.-Y.; Ravishankara, A.R. Kinetics of the reactions of OH with alkanes. *Int. J. Chem. Kinet.* **1994**, *26*, 973–990.
3. Harris S.J.; Kerr, J.A. Relative rate measurements of some reactions of hydroxyl radicals with alkanes studied under atmospheric conditions. *Int. J. Chem. Kinet.* **1988**, *20*, 939–955.
4. Crawford, M.A.; Dang, B.; Hoang, J.; Li, Z. Kinetic study of OH radical reaction with n-heptane and n-hexane at 240–340K using the relative rate/discharge flow/mass spectrometry (RR/DF/MS) technique. *Int. J. Chem. Kinet.* **2011**, *43*, 489–497.
5. Wilson, E.W.; Hamilton, W.A.; Kennington, H.R. Evans B, Scott NW, DeMore WB. Measurement and Estimation of Rate Constants for the Reactions of Hydroxyl Radical with Several Alkanes and Cycloalkanes. *J. Phys. Chem. A*. **2006**, *110*, 3593–3604.
6. Li, Z.; Singh, S.; Woodward, W.; Dang, L. Kinetics Study of OH Radical Reactions with n-Octane, n-Nonane, and n-Decane at 240–340 K Using the Relative Rate/Discharge Flow/Mass Spectrometry Technique. *J. Phys. Chem. A* **2006**, *110*, 12150–12157.
7. Sprengnether, M.M.; Demerjian, K.L.; Dransfield, T.J.; Clarke, J.S.; Anderson, J.G.; Donahue, N.M. Rate Constants of Nine C6–C9 Alkanes with OH from 230 to 379 K: Chemical Tracers for [OH]. *J. Phys. Chem. A* **2009**; *113*, 5030–5038.
8. Singh, S.; de Leon, M.F.; Li, Z. Kinetics Study of the Reaction of OH Radicals with C5–C8 Cycloalkanes at 240–340 K using the Relative Rate/Discharge Flow/Mass Spectrometry Technique. *J. Phys. Chem. A* **2013**, *117*, 10863–10872.
9. Tully, F.P.; Ravishankara, A.R.; Thompson, R.L.; Nicovich, J.M.; Shah, R.C.; Kreutter, N.M.; Wine, P.H. Kinetics of the reactions of hydroxyl radical with benzene and toluene. *J. Phys. Chem.* **1981**, *85*, 2262–2269.
10. Witte, F.; Urbanik, E.; Zetzsch, C. Temperature dependence of the rate constants for the addition of hydroxyl to benzene and to some monosubstituted aromatics (aniline, bromobenzene, and nitrobenzene) and the unimolecular decay of the adducts. Part 2. Kinetics into a quasi-equilibrium. *J. Phys. Chem.* **1986**, *90*, 3251–3259.
11. Semadeni, M.; Stocker, D.W.; Kerr, J.A. The temperature dependence of the OH radical reactions with some aromatic compounds under simulated tropospheric conditions. *Int. J. Chem. Kinet.* **1995**, *27*, 287–304.
12. Mehta, D.; Nguyen, A.; Montenegro, A.; Li, Z.; A Kinetic Study of the Reaction of OH with Xylenes Using the Relative Rate/Discharge Flow/Mass Spectrometry Technique. *J. Phys. Chem. A* **2009**, *113*, 12942–12951.
13. Alarcón, P.; Bohn, B.; Zetzsch, C. Kinetic and mechanistic study of the reaction of OH radicals with methylated benzenes: 1,4-dimethyl-, 1,3,5-trimethyl-, 1,2,4,5-, 1,2,3,5- and 1,2,3,4-tetramethyl-, pentamethyl-, and hexamethylbenzene. *Phys. Chem. Chem. Phys.* **2015**, *17*, 13053–13065.
14. Gavrilov, R. Experimental and theoretical examination of the chemical kinetics of a pollutant coating on porous particles. Available online: <https://epub.uni-bayreuth.de/521/> (accessed on 8 January 2018).
15. IUPAC. Preferred value for toluene of the IUPAC Task Group on Atmospheric Chemical Kinetic Data Evaluation, Available online: <http://Iupac.Pole-Ether.Fr/> (accessed on 8 January 2018).
16. Atkinson, R. Kinetics of the gas-phase reactions of OH radicals with alkanes and cycloalkanes. *Atmos. Chem. Phys.* **2003**, *3*, 2233–2307.
